# Supplementary material for: New mixed metal selenites and tellurites containing Pd2+ions in a square planar geometry
Source: Royal Society of Chemistry journal article supplement (doi:10.1039/c1dt11836f), 2011-12-16
Supplement: c1dt11836f.pdf [file c1dt11836f.pdf]

# New Mixed Metal Selenites and Tellurites Containing Pd<sup>2+</sup> Ions in a Square Planar Geometry

Su-Yu Zhang,<sup>a, b</sup> Chun-Li Hu,<sup>a</sup> Jiang-Gao Mao<sup>\*, a</sup>

## Supporting information

Table S1. State Energies (eV) of the L-CB and the H-VB of the title compounds.

Scheme S1. The coordination environments around Ba(II) in BaPd(SeO<sub>3</sub>)<sub>2</sub> (a), Bi(III) in Bi<sub>2</sub>Pd(SeO<sub>3</sub>)<sub>4</sub> (b) and Pb(□) in Pb<sub>2</sub>Pd(SeO<sub>3</sub>)<sub>2</sub>Cl<sub>2</sub> (c).

Figure S1. Simulated and experimental XRD powder patterns for BaPd(SeO<sub>3</sub>)<sub>2</sub> (a), Bi<sub>2</sub>Pd(SeO<sub>3</sub>)<sub>4</sub> (b), Pb<sub>2</sub>Pd(SeO<sub>3</sub>)<sub>2</sub>Cl<sub>2</sub> (c) and Pb<sub>2</sub>Pd(TeO<sub>3</sub>)<sub>2</sub>Cl<sub>2</sub> (d).

Figure S2. IR Spectra of BaPd(SeO<sub>3</sub>)<sub>2</sub> (a), Bi<sub>2</sub>Pd(SeO<sub>3</sub>)<sub>4</sub> (b), Pb<sub>2</sub>Pd(SeO<sub>3</sub>)<sub>2</sub>Cl<sub>2</sub> (c), and Pb<sub>2</sub>Pd(TeO<sub>3</sub>)<sub>2</sub>Cl<sub>2</sub> (d).

Figure S3. Absorption spectra for BaPd(SeO<sub>3</sub>)<sub>2</sub> (a), Bi<sub>2</sub>Pd(SeO<sub>3</sub>)<sub>4</sub> (b), Pb<sub>2</sub>Pd(SeO<sub>3</sub>)<sub>2</sub>Cl<sub>2</sub> (c) and Pb<sub>2</sub>Pd(TeO<sub>3</sub>)<sub>2</sub>Cl<sub>2</sub> (d).

Figure S4. Optical diffuse reflectance spectra for BaPd(SeO<sub>3</sub>)<sub>2</sub> (a), Bi<sub>2</sub>Pd(SeO<sub>3</sub>)<sub>4</sub> (b), Pb<sub>2</sub>Pd(SeO<sub>3</sub>)<sub>2</sub>Cl<sub>2</sub> (c) and Pb<sub>2</sub>Pd(TeO<sub>3</sub>)<sub>2</sub>Cl<sub>2</sub> (d).

Figure S5. The PXRD patterns of the thermal decomposition residuals for BaPd(SeO<sub>3</sub>)<sub>2</sub>.

Figure S6. The band structures of BaPd(SeO<sub>3</sub>)<sub>2</sub>, Bi<sub>2</sub>Pd(SeO<sub>3</sub>)<sub>4</sub> and Pb<sub>2</sub>Pd(QO<sub>3</sub>)<sub>2</sub>Cl<sub>2</sub> (Q = Se, Te).

Figure S7. The total density of states and partial density of states of BaPd(SeO<sub>3</sub>)<sub>2</sub>, Bi<sub>2</sub>Pd(SeO<sub>3</sub>)<sub>4</sub> and Pb<sub>2</sub>Pd(QO<sub>3</sub>)<sub>2</sub>Cl<sub>2</sub> (Q = Se, Te) (the Fermi level is set at 0 eV).

Cif files for the structures.

Table S1. State Energies (eV) of the L-CB and the H-VB of the title compounds.

| BaPd(SeO <sub>3</sub> ) <sub>2</sub>                               | k-point | L-CB     | H-VB     |
|--------------------------------------------------------------------|---------|----------|----------|
| (-0.500 0.000 0.500)                                               | L       | 1.333601 | -0.28069 |
| (-0.500 -0.500 0.500)                                              | M       | 2.051396 | -0.47514 |
| (-0.500 0.000 0.000)                                               | A       | 1.321754 | -0.2795  |
| (0.000 0.000 0.000)                                                | G       | 2.005804 | 0        |
| (0.000 -0.500 0.500)                                               | Z       | 1.333602 | -0.28069 |
| (0.000 0.000 0.500)                                                | Y       | 2.040714 | -0.0876  |
| Bi <sub>2</sub> Pd(SeO <sub>3</sub> ) <sub>4</sub>                 | k-point | L-CB     | H-VB     |
| (0.000 0.000 0.500)                                                | Z       | 1.87506  | -0.06531 |
| (0.000 0.000 0.000)                                                | G       | 1.732786 | -0.00947 |
| (0.000 0.500 0.000)                                                | Y       | 1.901132 | -0.0588  |
| (-0.500 0.500 0.000)                                               | A       | 1.859624 | -0.07155 |
| (-0.500 0.000 0.000)                                               | B       | 1.746502 | 0        |
|                                                                    |         | 1.730646 | -0.00661 |
| (-0.500 0.000 0.500)                                               | D       | 1.911726 | -0.07887 |
| (-0.500 0.500 0.500)                                               | E       | 1.909796 | -0.01988 |
| (0.000 0.500 0.500)                                                | C       | 1.911236 | -0.00703 |
| Pb <sub>2</sub> Pd(SeO <sub>3</sub> ) <sub>2</sub> Cl <sub>2</sub> | k-point | L-CB     | H-VB     |
| (0.000 0.000 0.500)                                                | Z       | 1.611028 | -0.22459 |
| (0.000 0.000 0.000)                                                | G       | 1.435236 | -0.27218 |

|                                                   |         |          |          |
|---------------------------------------------------|---------|----------|----------|
| (0.000 0.500 0.000)                               | Y       | 1.74822  | -0.17649 |
| (-0.500 0.500 0.000)                              | A       | 1.697095 | -0.23647 |
| (-0.500 0.000 0.000)                              | B       | 1.667216 | 0        |
| (-0.500 0.000 0.500)                              | D       | 1.65292  | -0.22256 |
| (-0.500 0.500 0.500)                              | E       | 1.724946 | -0.13943 |
| (0.000 0.500 0.500)                               | C       | 1.745808 | -0.20726 |
| $\text{Pb}_2\text{Pd}(\text{TeO}_3)_2\text{Cl}_2$ | k-point | L-CB     | H-VB     |
| (0.000 0.000 0.500)                               | Z       | 1.692913 | -0.2669  |
| (0.000 0.000 0.000)                               | G       | 1.426912 | -0.28505 |
| (0.000 0.500 0.000)                               | Y       | 1.777802 | -0.11053 |
| (-0.500 0.500 0.000)                              | A       | 1.720093 | -0.20291 |
| (-0.500 0.000 0.000)                              | B       | 1.695195 | 0        |
| (-0.500 0.000 0.500)                              | D       | 1.693771 | -0.19609 |
| (-0.500 0.500 0.500)                              | E       | 1.751475 | -0.15054 |
| (0.000 0.500 0.500)                               | C       | 1.79618  | -0.12339 |

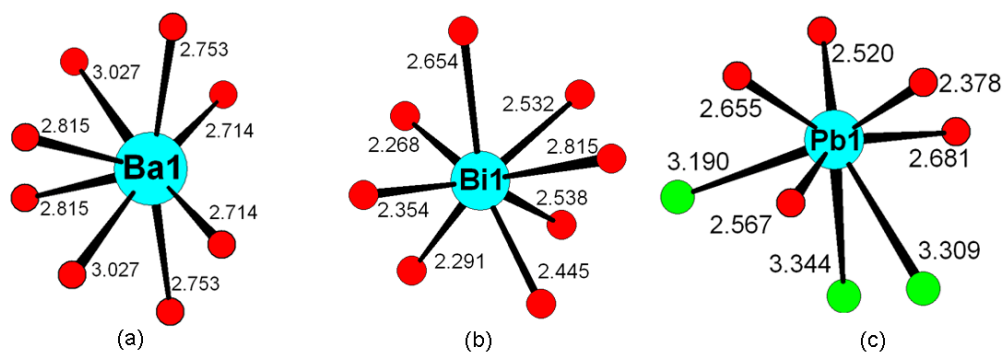

Scheme S1. The coordination environments around Ba(II) in BaPd(SeO<sub>3</sub>)<sub>2</sub> (a), Bi(III) in Bi<sub>2</sub>Pd(SeO<sub>3</sub>)<sub>4</sub> (b) and Pb(II) in Pb<sub>2</sub>Pd(SeO<sub>3</sub>)<sub>2</sub>Cl<sub>2</sub> (c).

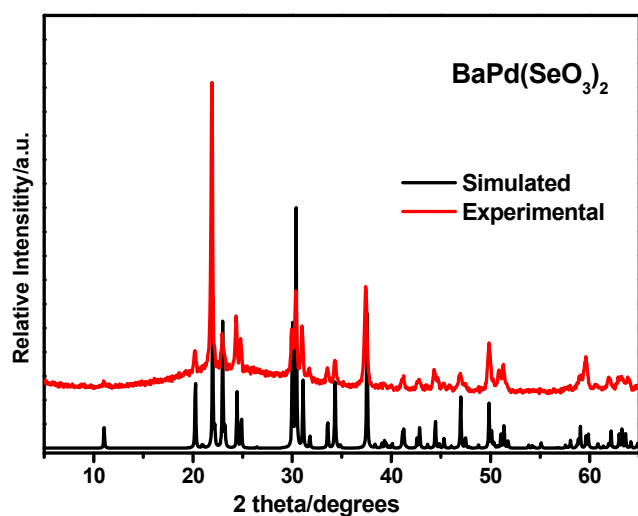

(a)

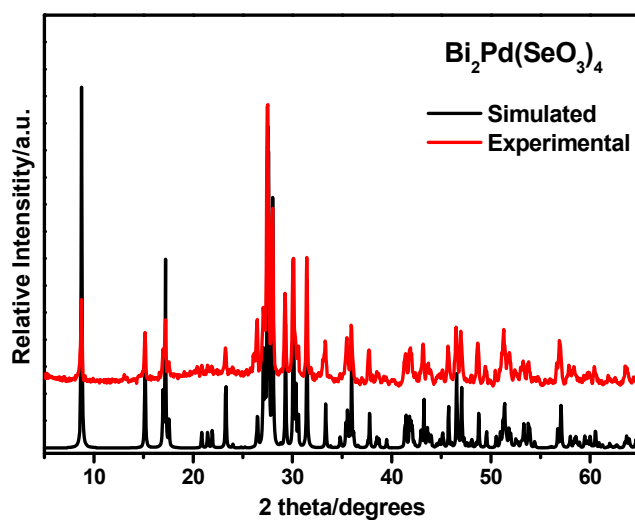

(b)

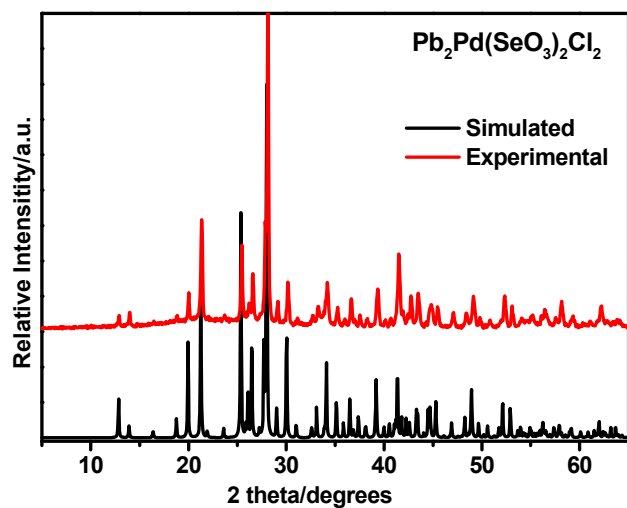

(c)

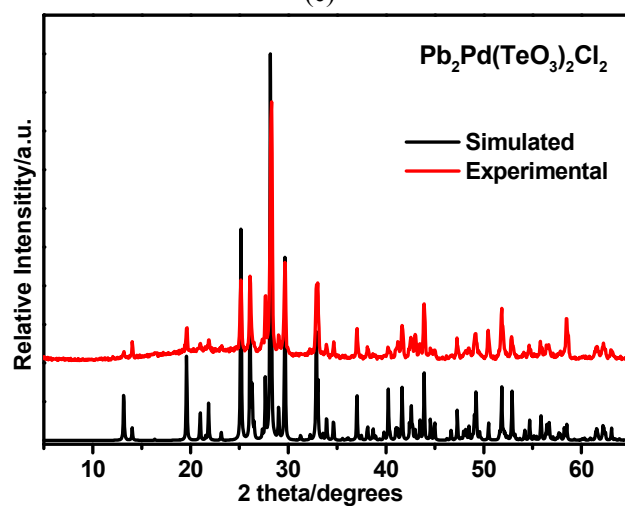

(d)

Figure S1. Simulated and experimental XRD powder patterns for  $\text{BaPd}(\text{SeO}_3)_2$  (a),  $\text{Bi}_2\text{Pd}(\text{SeO}_3)_4$  (b),  $\text{Pb}_2\text{Pd}(\text{SeO}_3)_2\text{Cl}_2$  (c) and  $\text{Pb}_2\text{Pd}(\text{TeO}_3)_2\text{Cl}_2$  (d).

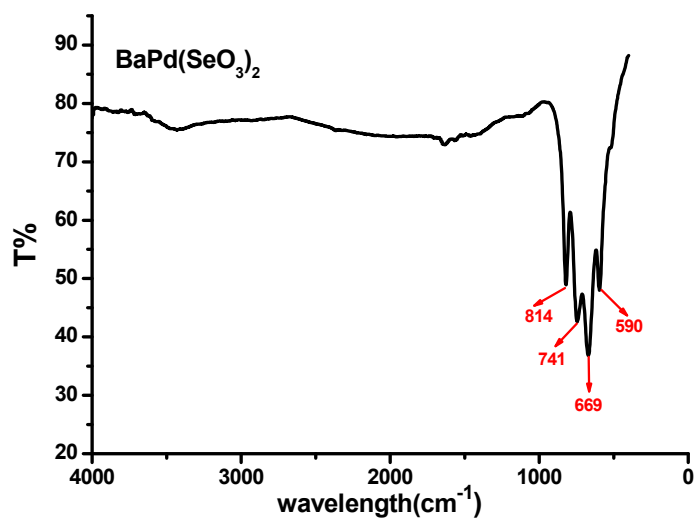

(a)

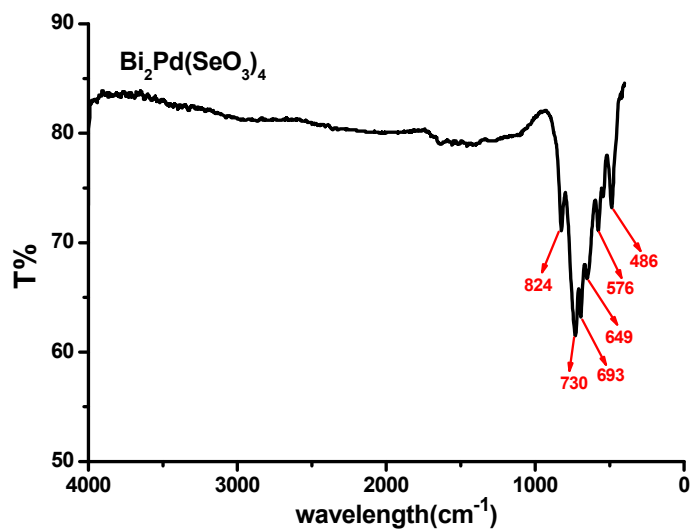

(b)

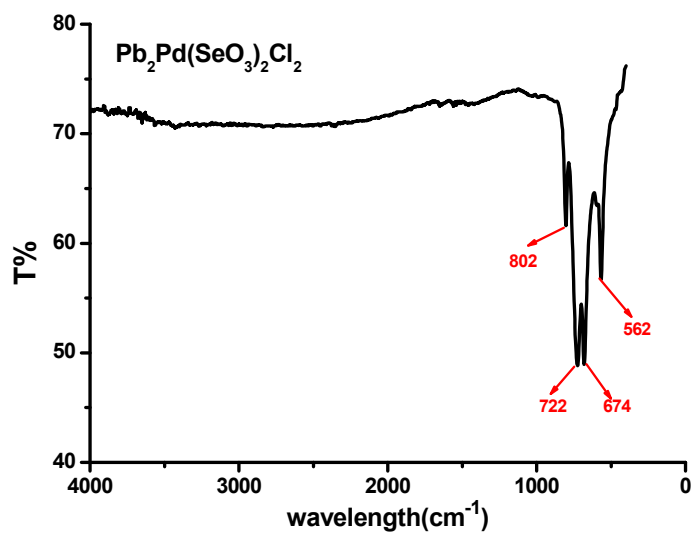

(c)

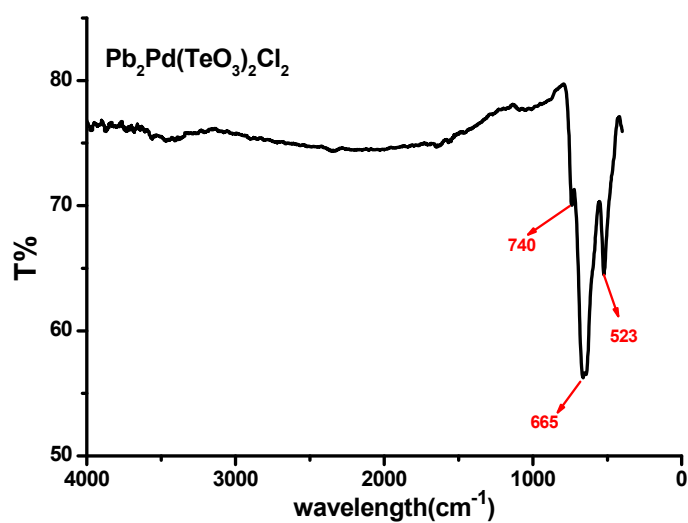

(d)

Figure S2. IR Spectra of BaPd(SeO<sub>3</sub>)<sub>2</sub> (a), Bi<sub>2</sub>Pd(SeO<sub>3</sub>)<sub>4</sub> (b), Pb<sub>2</sub>Pd(SeO<sub>3</sub>)<sub>2</sub>Cl<sub>2</sub> (c), and Pb<sub>2</sub>Pd(TeO<sub>3</sub>)<sub>2</sub>Cl<sub>2</sub> (d).

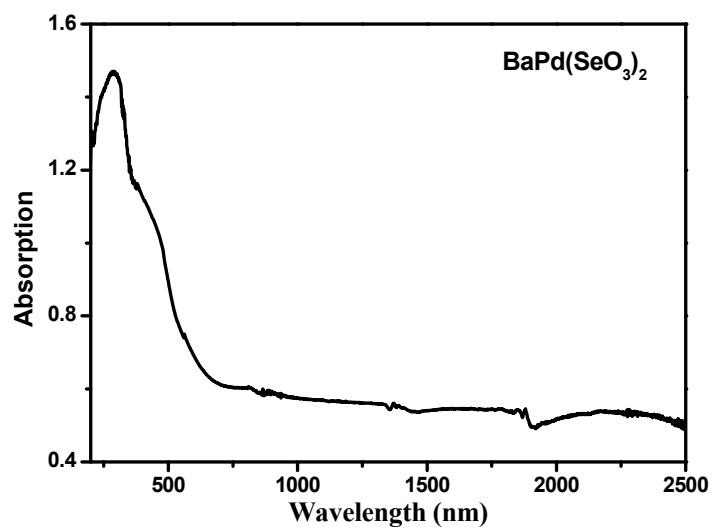

(a)

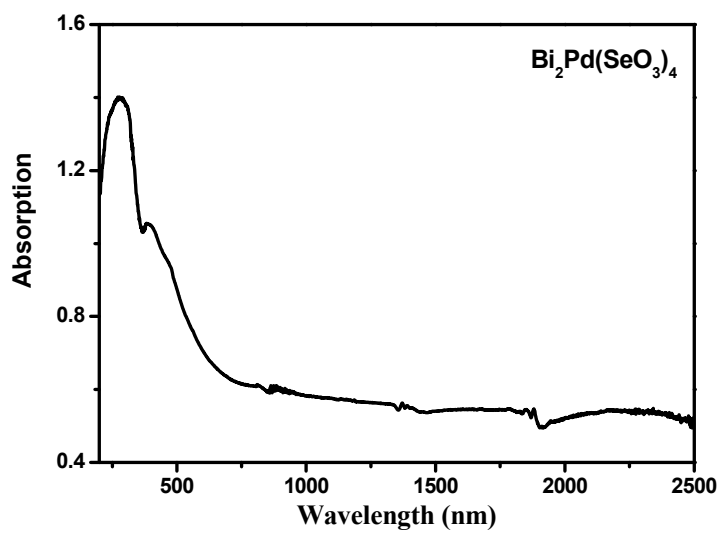

(b)

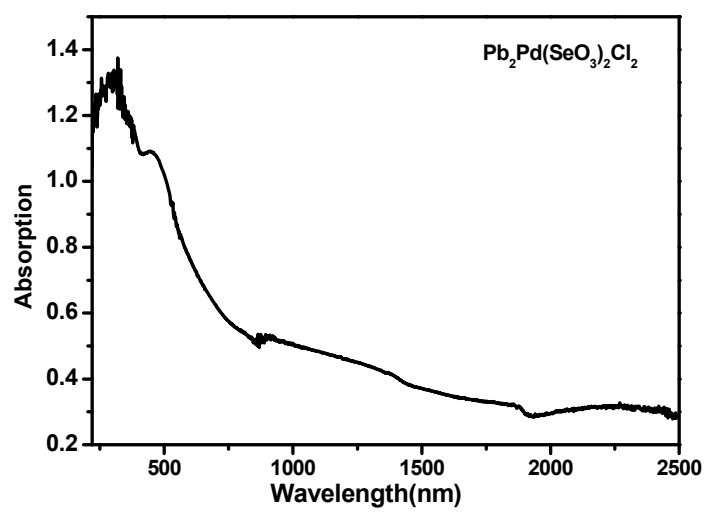

(c)

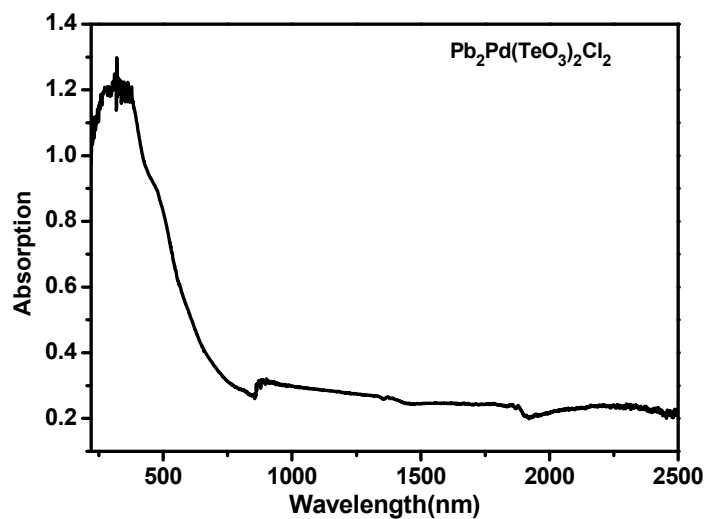

(d)

Figure S3. Absorption spectra for  $\text{BaPd}(\text{SeO}_3)_2$  (a),  $\text{Bi}_2\text{Pd}(\text{SeO}_3)_4$  (b),  $\text{Pb}_2\text{Pd}(\text{SeO}_3)_2\text{Cl}_2$  (c) and  $\text{Pb}_2\text{Pd}(\text{TeO}_3)_2\text{Cl}_2$  (d).

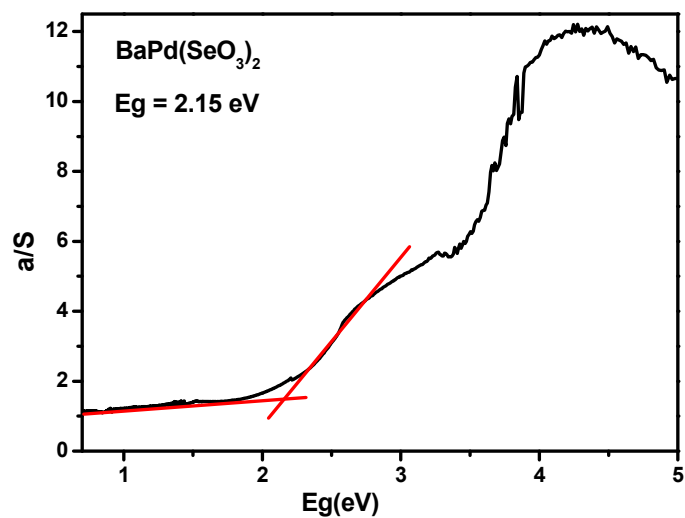

(a)

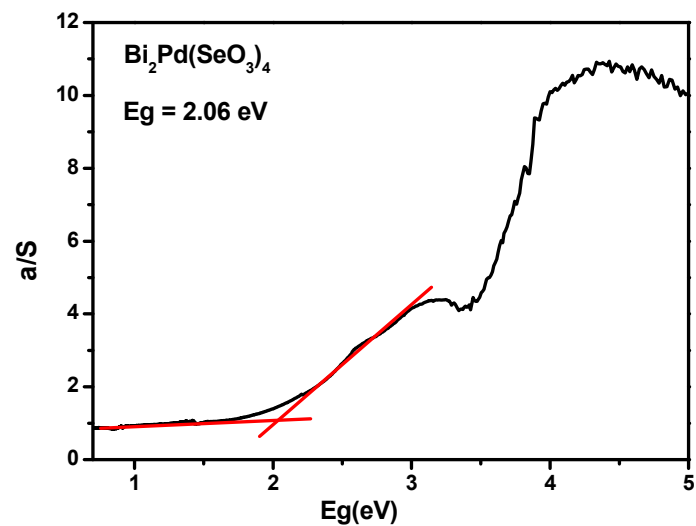



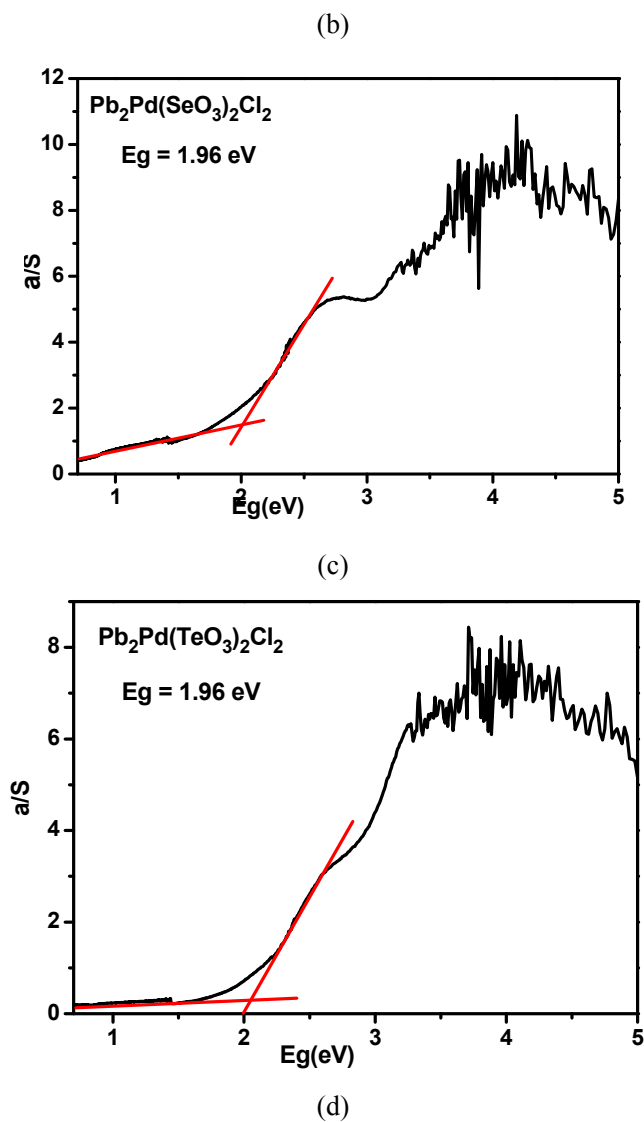

Figure S4. Optical diffuse reflectance spectra for  $\text{BaPd}(\text{SeO}_3)_2$  (a),  $\text{Bi}_2\text{Pd}(\text{SeO}_3)_4$  (b),  $\text{Pb}_2\text{Pd}(\text{SeO}_3)_2\text{Cl}_2$  (c) and  $\text{Pb}_2\text{Pd}(\text{TeO}_3)_2\text{Cl}_2$  (d).

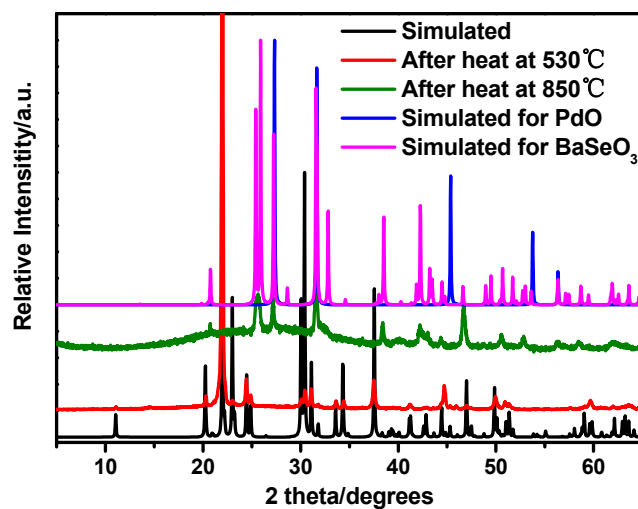

Figure S5. The PXRD patterns of the thermal decomposition residuals for  $\text{BaPd}(\text{SeO}_3)_2$ .

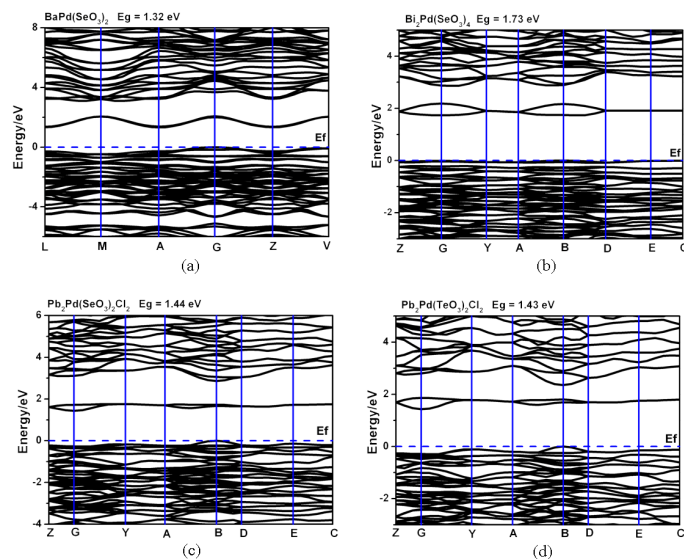

Figure S6. The band structures of BaPd(SeO<sub>3</sub>)<sub>2</sub>, Bi<sub>2</sub>Pd(SeO<sub>3</sub>)<sub>4</sub> and Pb<sub>2</sub>Pd(QO<sub>3</sub>)<sub>2</sub>Cl<sub>2</sub> (Q = Se, Te).

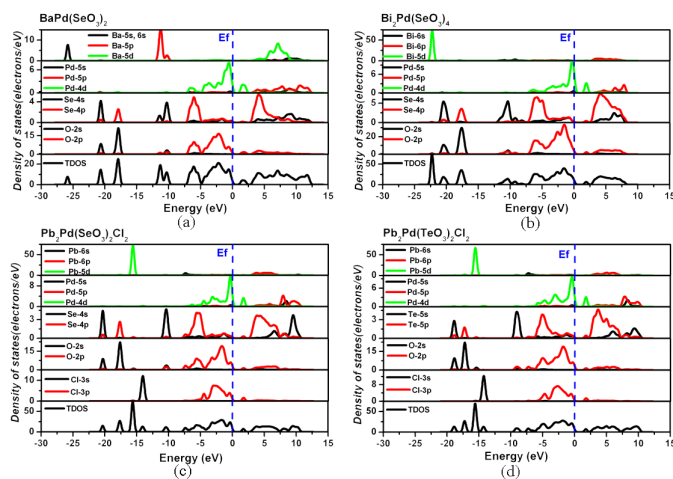

Figure S7. The total density of states and partial density of states of BaPd(SeO<sub>3</sub>)<sub>2</sub>, Bi<sub>2</sub>Pd(SeO<sub>3</sub>)<sub>4</sub> and Pb<sub>2</sub>Pd(QO<sub>3</sub>)<sub>2</sub>Cl<sub>2</sub> (Q = Se, Te) (the Fermi level is set at 0 eV).

```
data_global
_journal_name_full          'Dalton Trans.'

_journal_codен_Cambridge    0222
_journal_volume             ?
_journal_page_first         ?
_journal_year               ?

_publ_contact_author_name   'Prof. Jiang-Gao Mao'
_publ_contact_author_email  mjg@fjirsm.ac.cn

_publ_section_title
;
New Mixed Metal Selenites
and Tellurites Containing Pd2+ Ions in a
Square Planar Geometry
;
_publ_author_name           'Jiang-Gao Mao'

#===end

data_Pb2Pd(TeO3)2Cl2

_audit_creation_method      SHELXL-97
_chemical_name_systematic
;
?
;
_chemical_name_common       ?
_chemical_melting_point     ?
_chemical_formula_moiety    'Cl2 O6 Pb2 Pd Te2'
_chemical_formula_sum       'Cl2 O6 Pb2 Pd Te2'

_chemical_formula_weight    942.92

loop_
_atom_type_symbol
_atom_type_description
_atom_type_scат_dispersiоn_real
_atom_type_scат_dispersiоn_imag
_atom_type_scат_source
Cl Cl 0.1484 0.1585 'International Tables Vol C Tables 4.2.6.8 and 6.1.1.4'
```

O O 0.0106 0.0060 'International Tables Vol C Tables 4.2.6.8 and 6.1.1.4'  
Pb Pb -3.3944 10.1111 'International Tables Vol C Tables 4.2.6.8 and 6.1.1.4'  
Pd Pd -0.9988 1.0072 'International Tables Vol C Tables 4.2.6.8 and 6.1.1.4'  
Te Te -0.5308 1.6751 'International Tables Vol C Tables 4.2.6.8 and 6.1.1.4'

\_symmetry\_cell\_setting monoclinic  
\_symmetry\_space\_group\_name\_H-M P2(1)/c

loop\_  
\_symmetry\_equiv\_pos\_as\_xyz  
'x, y, z'  
'-x, y+1/2, -z+1/2'  
'-x, -y, -z'  
'x, -y-1/2, z-1/2'

\_cell\_length\_a 8.145(2)  
\_cell\_length\_b 5.4447(15)  
\_cell\_length\_c 13.140(3)  
\_cell\_angle\_alpha 90.00  
\_cell\_angle\_beta 124.444(11)  
\_cell\_angle\_gamma 90.00  
\_cell\_volume 480.6(2)  
\_cell\_formula\_units\_Z 2  
\_cell\_measurement\_temperature 293(2)  
\_cell\_measurement\_reflns\_used 1454  
\_cell\_measurement\_theta\_min 2.5059  
\_cell\_measurement\_theta\_max 27.4835

\_exptl\_crystal\_description block  
\_exptl\_crystal\_colour red  
\_exptl\_crystal\_size\_max 0.2000  
\_exptl\_crystal\_size\_mid 0.1500  
\_exptl\_crystal\_size\_min 0.1500  
\_exptl\_crystal\_density\_meas ?  
\_exptl\_crystal\_density\_diffn 6.516  
\_exptl\_crystal\_density\_method 'not measured'  
\_exptl\_crystal\_F\_000 792  
\_exptl\_absorpt\_coefficient\_mu 43.296  
\_exptl\_absorpt\_correction\_type Multi-scan  
\_exptl\_absorpt\_correction\_T\_max 1.0000  
\_exptl\_absorpt\_correction\_T\_min 0.3865  
\_exptl\_absorpt\_process\_details

;

Higashi, T. (1995). Program for Absorption Correction.

Rigaku Corporation, Tokyo, Japan.

;

\_exptl\_special\_details

;

?

;

|                                       |                                    |
|---------------------------------------|------------------------------------|
| _diffraction_ambient_temperature      | 293(2)                             |
| _diffraction_radiation_wavelength     | 0.71073                            |
| _diffraction_radiation_type           | MoK $\alpha$                       |
| _diffraction_radiation_source         | 'fine-focus sealed tube'           |
| _diffraction_radiation_monochromator  | graphite                           |
| _diffraction_measurement_device_type  | Mercury2                           |
| _diffraction_measurement_method       | CCD_Profile_fitting                |
| _diffraction_detector_area_resol_mean | ?                                  |
| _diffraction_standards_number         | ?                                  |
| _diffraction_standards_interval_count | ?                                  |
| _diffraction_standards_interval_time  | ?                                  |
| _diffraction_standards_decay_%        | <1.0                               |
| _diffraction_reflns_number            | 3548                               |
| _diffraction_reflns_av_R_equivalents  | 0.0441                             |
| _diffraction_reflns_av_sigmaI/netI    | 0.0433                             |
| _diffraction_reflns_limit_h_min       | -10                                |
| _diffraction_reflns_limit_h_max       | 10                                 |
| _diffraction_reflns_limit_k_min       | -7                                 |
| _diffraction_reflns_limit_k_max       | 7                                  |
| _diffraction_reflns_limit_l_min       | -16                                |
| _diffraction_reflns_limit_l_max       | 17                                 |
| _diffraction_reflns_theta_min         | 3.03                               |
| _diffraction_reflns_theta_max         | 27.48                              |
| _reflns_number_total                  | 1090                               |
| _reflns_number_gt                     | 1029                               |
| _reflns_threshold_expression          | >2sigma(I)                         |
| _computing_data_collection            | 'CrystalClear (Rigaku Inc., 2007)' |
| _computing_cell_refinement            | 'CrystalClear (Rigaku Inc., 2007)' |
| _computing_data_reduction             | 'CrystalClear (Rigaku Inc., 2007)' |
| _computing_structure_solution         | 'SHELXS-97 (Sheldrick, 1990)'      |
| _computing_structure_refinement       | 'SHELXL-97 (Sheldrick, 1997)'      |
| _computing_molecular_graphics         | ?                                  |
| _computing_publication_material       | ?                                  |

\_refine\_special\_details

;

Refinement of  $F^2$  against ALL reflections. The weighted R-factor  $wR$  and goodness of fit  $S$  are based on  $F^2$ , conventional R-factors  $R$  are based on  $F$ , with  $F$  set to zero for negative  $F^2$ . The threshold expression of  $F^2 > 2\sigma(F^2)$  is used only for calculating R-factors(gt) etc. and is not relevant to the choice of reflections for refinement. R-factors based on  $F^2$  are statistically about twice as large as those based on  $F$ , and R-factors based on ALL data will be even larger.

;

```
_refine_ls_structure_factor_coef Fsqd
_refine_ls_matrix_type          full
_refine_ls_weighting_scheme     calc
_refine_ls_weighting_details
'calc w=1/[\s^2^(Fo^2)+(0.0227P)^2+0.0000P] where P=(Fo^2+2Fc^2)/3'
_refine_ls_extinction_method    SHELXL
_refine_ls_extinction_coef      0.0047(2)
_refine_ls_extinction_expression Fc^*=kFc[1+0.001xFc^2\l^3/sin(2\q)]^-1/4^
_refine_ls_number_reflns        1090
_refine_ls_number_parameters     62
_refine_ls_number_restraints     0
_refine_ls_R_factor_all          0.0270
_refine_ls_R_factor_gt           0.0253
_refine_ls_wR_factor_ref         0.0583
_refine_ls_wR_factor_gt          0.0575
_refine_ls_goodness_of_fit_ref   1.050
_refine_ls_restrained_S_all      1.050
_refine_ls_shift/su_max          0.001
_refine_ls_shift/su_mean         0.000
```

```
loop_
  _atom_site_label
  _atom_site_type_symbol
  _atom_site_fract_x
  _atom_site_fract_y
  _atom_site_fract_z
  _atom_site_U_iso_or_equiv
  _atom_site_adp_type
  _atom_site_occupancy
  _atom_site_symmetry_multiplicity
```

```
_atom_site_calc_flag  
_atom_site_refinement_flags  
_atom_site_disorder_assembly  
_atom_site_disorder_group  
Pb1 Pb -0.15499(4) 0.04100(6) 0.30133(3) 0.01095(14) Uani 1 1 d . . .  
Te1 Te 0.22274(8) 0.51281(9) 0.49191(5) 0.00745(15) Uani 1 1 d . . .  
Pd1 Pd 0.5000 1.0000 0.5000 0.0072(2) Uani 1 2 d S . .  
Cl1 Cl -0.4521(3) -0.4235(4) 0.18643(18) 0.0146(4) Uani 1 1 d . . .  
O1 O 0.0680(8) 0.3528(11) 0.3391(5) 0.0133(13) Uani 1 1 d . . .  
O2 O 0.3314(10) 0.7049(13) 0.4224(6) 0.0284(17) Uani 1 1 d . . .  
O3 O 0.0452(9) 0.7456(12) 0.4795(6) 0.0198(14) Uani 1 1 d . . .
```

```
loop_  
_atom_site_aniso_label  
_atom_site_aniso_U_11  
_atom_site_aniso_U_22  
_atom_site_aniso_U_33  
_atom_site_aniso_U_23  
_atom_site_aniso_U_13  
_atom_site_aniso_U_12  
Pb1 0.01125(19) 0.0116(2) 0.0097(2) -0.00118(12) 0.00577(15) -0.00277(11)  
Te1 0.0092(3) 0.0084(3) 0.0041(3) 0.00001(19) 0.0034(2) 0.00019(18)  
Pd1 0.0091(4) 0.0085(5) 0.0039(4) -0.0013(3) 0.0036(4) -0.0029(3)  
Cl1 0.0191(10) 0.0183(12) 0.0079(10) -0.0010(8) 0.0085(8) -0.0013(8)  
O1 0.019(3) 0.014(4) 0.008(3) -0.006(2) 0.008(2) -0.009(2)  
O2 0.040(4) 0.033(4) 0.012(3) -0.010(3) 0.014(3) -0.030(3)  
O3 0.024(3) 0.013(4) 0.019(3) -0.001(3) 0.010(3) 0.010(2)
```

```
_geom_special_details
```

```
;
```

All esds (except the esd in the dihedral angle between two l.s. planes) are estimated using the full covariance matrix. The cell esds are taken into account individually in the estimation of esds in distances, angles and torsion angles; correlations between esds in cell parameters are only used when they are defined by crystal symmetry. An approximate (isotropic) treatment of cell esds is used for estimating esds involving l.s. planes.

```
;
```

```
loop_  
_geom_bond_atom_site_label_1  
_geom_bond_atom_site_label_2  
_geom_bond_distance  
_geom_bond_site_symmetry_2  
_geom_bond_publ_flag
```

Pb1 O1 2.326(5) . ?  
Pb1 O3 2.532(6) 1\_545 ?  
Pb1 O1 2.536(5) 2\_545 ?  
Pb1 O2 2.593(6) 2\_545 ?  
Pb1 O3 2.744(6) 3\_566 ?  
Pb1 Cl1 3.225(2) . ?  
Pb1 Cl1 3.299(2) 2\_455 ?  
Pb1 Te1 3.5734(11) 2\_545 ?  
Pb1 Te1 3.6906(9) . ?  
Pb1 Te1 3.9095(9) 3\_566 ?  
Pb1 Te1 3.9105(9) 1\_545 ?  
Pb1 Pb1 4.3500(13) 3\_556 ?  
Te1 O3 1.859(6) . ?  
Te1 O1 1.875(6) . ?  
Te1 O2 1.904(6) . ?  
Te1 Pd1 3.4461(8) . ?  
Te1 Pb1 3.5734(11) 2 ?  
Te1 Pb1 3.9095(9) 3\_566 ?  
Te1 Pb1 3.9105(9) 1\_565 ?  
Pd1 O2 1.981(6) 3\_676 ?  
Pd1 O2 1.981(6) . ?  
Pd1 Cl1 2.290(2) 4\_666 ?  
Pd1 Cl1 2.290(2) 2\_565 ?  
Pd1 Te1 3.4461(8) 3\_676 ?  
Cl1 Pd1 2.290(2) 2\_535 ?  
Cl1 Pb1 3.299(2) 2\_445 ?  
O1 Pb1 2.536(5) 2 ?  
O2 Pb1 2.593(6) 2 ?  
O3 Pb1 2.532(6) 1\_565 ?  
O3 Pb1 2.744(6) 3\_566 ?

loop\_

\_geom\_angle\_atom\_site\_label\_1  
\_geom\_angle\_atom\_site\_label\_2  
\_geom\_angle\_atom\_site\_label\_3  
\_geom\_angle  
\_geom\_angle\_site\_symmetry\_1  
\_geom\_angle\_site\_symmetry\_3  
\_geom\_angle\_publ\_flag  
O1 Pb1 O3 104.5(2) . 1\_545 ?  
O1 Pb1 O1 86.80(12) . 2\_545 ?  
O3 Pb1 O1 96.74(19) 1\_545 2\_545 ?  
O1 Pb1 O2 81.7(2) . 2\_545 ?  
O3 Pb1 O2 157.09(19) 1\_545 2\_545 ?



O1 Pb1 O2 61.19(18) 2\_545 2\_545 ?  
O1 Pb1 O3 73.47(19) . 3\_566 ?  
O3 Pb1 O3 69.0(2) 1\_545 3\_566 ?  
O1 Pb1 O3 151.05(18) 2\_545 3\_566 ?  
O2 Pb1 O3 133.4(2) 2\_545 3\_566 ?  
O1 Pb1 Cl1 163.98(14) . . ?  
O3 Pb1 Cl1 81.66(15) 1\_545 . ?  
O1 Pb1 Cl1 77.70(14) 2\_545 . ?  
O2 Pb1 Cl1 87.21(18) 2\_545 . ?  
O3 Pb1 Cl1 122.43(15) 3\_566 . ?  
O1 Pb1 Cl1 127.51(15) . 2\_455 ?  
O3 Pb1 Cl1 97.30(15) 1\_545 2\_455 ?  
O1 Pb1 Cl1 137.45(14) 2\_545 2\_455 ?  
O2 Pb1 Cl1 96.00(15) 2\_545 2\_455 ?  
O3 Pb1 Cl1 70.94(14) 3\_566 2\_455 ?  
Cl1 Pb1 Cl1 64.98(4) . 2\_455 ?  
O1 Pb1 Te1 83.51(14) . 2\_545 ?  
O3 Pb1 Te1 126.58(14) 1\_545 2\_545 ?  
O1 Pb1 Te1 30.08(12) 2\_545 2\_545 ?  
O2 Pb1 Te1 31.10(13) 2\_545 2\_545 ?  
O3 Pb1 Te1 155.46(14) 3\_566 2\_545 ?  
Cl1 Pb1 Te1 81.04(4) . 2\_545 ?  
Cl1 Pb1 Te1 119.51(4) 2\_455 2\_545 ?  
O1 Pb1 Te1 25.36(14) . . ?  
O3 Pb1 Te1 87.77(15) 1\_545 . ?  
O1 Pb1 Te1 107.82(13) 2\_545 . ?  
O2 Pb1 Te1 104.14(17) 2\_545 . ?  
O3 Pb1 Te1 48.80(14) 3\_566 . ?  
Cl1 Pb1 Te1 168.64(4) . . ?  
Cl1 Pb1 Te1 112.67(4) 2\_455 . ?  
Te1 Pb1 Te1 108.821(18) 2\_545 . ?  
O1 Pb1 Te1 78.37(14) . 3\_566 ?  
O3 Pb1 Te1 91.28(14) 1\_545 3\_566 ?  
O1 Pb1 Te1 164.53(14) 2\_545 3\_566 ?  
O2 Pb1 Te1 111.62(14) 2\_545 3\_566 ?  
O3 Pb1 Te1 25.56(12) 3\_566 3\_566 ?  
Cl1 Pb1 Te1 116.69(4) . 3\_566 ?  
Cl1 Pb1 Te1 53.68(4) 2\_455 3\_566 ?  
Te1 Pb1 Te1 141.226(15) 2\_545 3\_566 ?  
Te1 Pb1 Te1 59.14(2) . 3\_566 ?  
O1 Pb1 Te1 99.42(15) . 1\_545 ?  
O3 Pb1 Te1 22.87(14) 1\_545 1\_545 ?  
O1 Pb1 Te1 74.13(12) 2\_545 1\_545 ?  
O2 Pb1 Te1 135.22(13) 2\_545 1\_545 ?

O3 Pb1 Te1 88.17(12) 3\_566 1\_545 ?  
Cl1 Pb1 Te1 80.40(4) . 1\_545 ?  
Cl1 Pb1 Te1 116.44(4) 2\_455 1\_545 ?  
Te1 Pb1 Te1 104.163(18) 2\_545 1\_545 ?  
Te1 Pb1 Te1 91.45(2) . 1\_545 ?  
Te1 Pb1 Te1 112.40(2) 3\_566 1\_545 ?  
O1 Pb1 Pb1 88.05(14) . 3\_556 ?  
O3 Pb1 Pb1 36.07(14) 1\_545 3\_556 ?  
O1 Pb1 Pb1 128.34(12) 2\_545 3\_556 ?  
O2 Pb1 Pb1 165.76(16) 2\_545 3\_556 ?  
O3 Pb1 Pb1 32.91(13) 3\_566 3\_556 ?  
Cl1 Pb1 Pb1 104.71(4) . 3\_556 ?  
Cl1 Pb1 Pb1 82.41(4) 2\_455 3\_556 ?  
Te1 Pb1 Pb1 157.018(17) 2\_545 3\_556 ?  
Te1 Pb1 Pb1 64.013(16) . 3\_556 ?  
Te1 Pb1 Pb1 56.213(17) 3\_566 3\_556 ?  
Te1 Pb1 Pb1 56.191(13) 1\_545 3\_556 ?  
O3 Te1 O1 101.8(3) . . ?  
O3 Te1 O2 97.6(3) . . ?  
O1 Te1 O2 87.4(2) . . ?  
O3 Te1 Pd1 86.7(2) . . ?  
O1 Te1 Pd1 114.98(17) . . ?  
O2 Te1 Pd1 28.08(18) . . ?  
O3 Te1 Pb1 103.8(2) . 2 ?  
O1 Te1 Pb1 42.68(17) . 2 ?  
O2 Te1 Pb1 44.72(18) . 2 ?  
Pd1 Te1 Pb1 72.486(13) . 2 ?  
O3 Te1 Pb1 96.1(2) . . ?  
O1 Te1 Pb1 32.08(17) . . ?  
O2 Te1 Pb1 119.48(18) . . ?  
Pd1 Te1 Pb1 146.82(2) . . ?  
Pb1 Te1 Pb1 74.762(17) 2 . ?  
O3 Te1 Pb1 39.54(19) . 3\_566 ?  
O1 Te1 Pb1 139.40(17) . 3\_566 ?  
O2 Te1 Pb1 106.2(2) . 3\_566 ?  
Pd1 Te1 Pb1 81.25(2) . 3\_566 ?  
Pb1 Te1 Pb1 136.572(18) 2 3\_566 ?  
Pb1 Te1 Pb1 120.86(2) . 3\_566 ?  
O3 Te1 Pb1 32.0(2) . 1\_565 ?  
O1 Te1 Pb1 81.20(18) . 1\_565 ?  
O2 Te1 Pb1 72.5(2) . 1\_565 ?  
Pd1 Te1 Pb1 73.63(2) . 1\_565 ?  
Pb1 Te1 Pb1 72.070(16) 2 1\_565 ?  
Pb1 Te1 Pb1 91.45(3) . 1\_565 ?

Pb1 Te1 Pb1 67.60(2) 3\_566 1\_565 ?  
O2 Pd1 O2 180.000(1) 3\_676 . ?  
O2 Pd1 Cl1 87.01(18) 3\_676 4\_666 ?  
O2 Pd1 Cl1 92.99(18) . 4\_666 ?  
O2 Pd1 Cl1 92.99(18) 3\_676 2\_565 ?  
O2 Pd1 Cl1 87.01(18) . 2\_565 ?  
Cl1 Pd1 Cl1 180.0 4\_666 2\_565 ?  
O2 Pd1 Te1 26.90(17) 3\_676 3\_676 ?  
O2 Pd1 Te1 153.10(17) . 3\_676 ?  
Cl1 Pd1 Te1 113.25(6) 4\_666 3\_676 ?  
Cl1 Pd1 Te1 66.75(6) 2\_565 3\_676 ?  
O2 Pd1 Te1 153.10(17) 3\_676 . ?  
O2 Pd1 Te1 26.90(17) . . ?  
Cl1 Pd1 Te1 66.75(6) 4\_666 . ?  
Cl1 Pd1 Te1 113.25(6) 2\_565 . ?  
Te1 Pd1 Te1 180.0 3\_676 . ?  
Pd1 Cl1 Pb1 105.78(7) 2\_535 . ?  
Pd1 Cl1 Pb1 117.29(8) 2\_535 2\_445 ?  
Pb1 Cl1 Pb1 120.98(7) . 2\_445 ?  
Te1 O1 Pb1 122.6(3) . . ?  
Te1 O1 Pb1 107.2(2) . 2 ?  
Pb1 O1 Pb1 130.2(2) . 2 ?  
Te1 O2 Pd1 125.0(3) . . ?  
Te1 O2 Pb1 104.2(2) . 2 ?  
Pd1 O2 Pb1 129.9(3) . 2 ?  
Te1 O3 Pb1 125.2(3) . 1\_565 ?  
Te1 O3 Pb1 114.9(3) . 3\_566 ?  
Pb1 O3 Pb1 111.0(2) 1\_565 3\_566 ?

\_diffn\_measured\_fraction\_theta\_max 0.993  
\_diffn\_reflns\_theta\_full 27.48  
\_diffn\_measured\_fraction\_theta\_full 0.993  
\_refine\_diff\_density\_max 2.066  
\_refine\_diff\_density\_min -3.151  
\_refine\_diff\_density\_rms 0.388

#===end

data\_Pb2Pd(SeO3)2Cl2

\_audit\_creation\_method SHELXL-97  
\_chemical\_name\_systematic  
;

```
?  
;  
_chemical_name_common          ?  
_chemical_melting_point        ?  
_chemical_formula_moiety       'Cl2 O6 Pb2 Pd Se2'  
_chemical_formula_sum          'Cl2 O6 Pb2 Pd Se2'  
  
_chemical_formula_weight       845.64  
  
loop_  
_atom_type_symbol  
_atom_type_description  
_atom_type_scatter_dispersion_real  
_atom_type_scatter_dispersion_imag  
_atom_type_scatter_source  
Cl Cl 0.1484 0.1585 'International Tables Vol C Tables 4.2.6.8 and 6.1.1.4'  
O O 0.0106 0.0060 'International Tables Vol C Tables 4.2.6.8 and 6.1.1.4'  
Pb Pb -3.3944 10.1111 'International Tables Vol C Tables 4.2.6.8 and 6.1.1.4'  
Pd Pd -0.9988 1.0072 'International Tables Vol C Tables 4.2.6.8 and 6.1.1.4'  
Se Se -0.0929 2.2259 'International Tables Vol C Tables 4.2.6.8 and 6.1.1.4'  
  
_symmetry_cell_setting         monoclinic  
_symmetry_space_group_name_H-M P2(1)/c  
  
loop_  
_symmetry_equiv_pos_as_xyz  
'x, y, z'  
'-x, y+1/2, -z+1/2'  
'-x, -y, -z'  
'x, -y-1/2, z-1/2'  
  
_cell_length_a                 8.378(7)  
_cell_length_b                 5.255(4)  
_cell_length_c                 13.157(8)  
_cell_angle_alpha              90.00  
_cell_angle_beta               124.70(4)  
_cell_angle_gamma              90.00  
_cell_volume                   476.2(6)  
_cell_formula_units_Z          2  
_cell_measurement_temperature  293(2)  
_cell_measurement_reflns_used  1257  
_cell_measurement_theta_min    2.4392  
_cell_measurement_theta_max    27.4238
```

```
_exptl_crystal_description      Prism
_exptl_crystal_colour          red
_exptl_crystal_size_max        0.1000
_exptl_crystal_size_mid        0.0600
_exptl_crystal_size_min        0.0200
_exptl_crystal_density_meas    ?
_exptl_crystal_density_diffn   5.897
_exptl_crystal_density_method  'not measured'
_exptl_crystal_F_000           720
_exptl_absorpt_coefficient_mu  45.327
_exptl_absorpt_correction_type  Multi-scan
_exptl_absorpt_correction_T_max 1.0000
_exptl_absorpt_correction_T_min 0.6941
_exptl_absorpt_process_details
;
Higashi, T. (1995). Program for Absorption Correction.
Rigaku Corporation, Tokyo, Japan.
;

_exptl_special_details
;
?
;

_diffn_ambient_temperature      293(2)
_diffn_radiation_wavelength     0.71073
_diffn_radiation_type           MoK $\alpha$ 
_diffn_radiation_source         'fine-focus sealed tube'
_diffn_radiation_monochromator  graphite
_diffn_measurement_device_type  Mercury70
_diffn_measurement_method       CCD_Profile_fitting
_diffn_detector_area_resol_mean ?
_diffn_standards_number         ?
_diffn_standards_interval_count ?
_diffn_standards_interval_time ?
_diffn_standards_decay_%        <1.0
_diffn_reflns_number            3470
_diffn_reflns_av_R_equivalents  0.0447
_diffn_reflns_av_sigmaI/netI    0.0466
_diffn_reflns_limit_h_min       -10
_diffn_reflns_limit_h_max       10
_diffn_reflns_limit_k_min       -6
_diffn_reflns_limit_k_max       6
_diffn_reflns_limit_l_min       -15
```

```
_diffn_reflms_limit_l_max      15
_diffn_reflms_theta_min       3.20
_diffn_reflms_theta_max       27.41
_reflms_number_total          1040
_reflms_number_gt              957
_reflms_threshold_expression    >2sigma(I)

_computing_data_collection     'CrystalClear (Rigaku Inc., 2007)'
_computing_cell_refinement     'CrystalClear (Rigaku Inc., 2007)'
_computing_data_reduction      'CrystalClear (Rigaku Inc., 2007)'
_computing_structure_solution  'SHELXS-97 (Sheldrick, 1990)'
_computing_structure_refinement 'SHELXL-97 (Sheldrick, 1997)'
_computing_molecular_graphics  ?
_computing_publication_material ?
```

```
_refine_special_details
```

```
;
```

Refinement of  $F^2$  against ALL reflections. The weighted R-factor wR and goodness of fit S are based on  $F^2$ , conventional R-factors R are based on F, with F set to zero for negative  $F^2$ . The threshold expression of  $F^2 > 2\sigma(F^2)$  is used only for calculating R-factors(gt) etc. and is not relevant to the choice of reflections for refinement. R-factors based on  $F^2$  are statistically about twice as large as those based on F, and R-factors based on ALL data will be even larger.

```
;
```

```
_refine_ls_structure_factor_coef Fsqd
_refine_ls_matrix_type          full
_refine_ls_weighting_scheme     calc
_refine_ls_weighting_details
'calc w=1/[s^2(Fo^2)+(0.0372P)^2+0.0000P] where P=(Fo^2+2Fc^2)/3'
_atom_sites_solution_primary    direct
_atom_sites_solution_secondary  difmap
_atom_sites_solution_hydrogens  constr
_refine_ls_hydrogen_treatment   constr
_refine_ls_extinction_method    none
_refine_ls_extinction_coef      ?
_refine_ls_number_reflms        1040
_refine_ls_number_parameters     61
_refine_ls_number_restraints     0
_refine_ls_R_factor_all          0.0368
_refine_ls_R_factor_gt           0.0332
_refine_ls_wR_factor_ref         0.0761
_refine_ls_wR_factor_gt          0.0741
```

\_refine\_ls\_goodness\_of\_fit\_ref 1.097  
\_refine\_ls\_restrained\_S\_all 1.097  
\_refine\_ls\_shift/su\_max 0.000  
\_refine\_ls\_shift/su\_mean 0.000

loop\_

\_atom\_site\_label  
\_atom\_site\_type\_symbol  
\_atom\_site\_fract\_x  
\_atom\_site\_fract\_y  
\_atom\_site\_fract\_z  
\_atom\_site\_U\_iso\_or\_equiv  
\_atom\_site\_adp\_type  
\_atom\_site\_occupancy  
\_atom\_site\_symmetry\_multiplicity  
\_atom\_site\_calc\_flag  
\_atom\_site\_refinement\_flags  
\_atom\_site\_disorder\_assembly  
\_atom\_site\_disorder\_group  
Pb1 Pb -0.16407(5) 0.05632(6) 0.30404(4) 0.01615(16) Uani 1 1 d . . .  
Se1 Se 0.21242(13) 0.53731(16) 0.47696(9) 0.0135(2) Uani 1 1 d . . .  
Pd1 Pd 0.5000 1.0000 0.5000 0.0132(3) Uani 1 2 d S . .  
Cl1 Cl -0.4406(4) -0.4298(4) 0.1918(2) 0.0204(6) Uani 1 1 d . . .  
O1 O 0.0626(9) 0.3777(13) 0.3403(6) 0.0200(15) Uani 1 1 d . . .  
O2 O 0.3242(11) 0.7010(14) 0.4204(7) 0.0317(19) Uani 1 1 d . . .  
O3 O 0.0701(10) 0.7627(13) 0.4778(7) 0.0252(16) Uani 1 1 d . . .

loop\_

\_atom\_site\_aniso\_label  
\_atom\_site\_aniso\_U\_11  
\_atom\_site\_aniso\_U\_22  
\_atom\_site\_aniso\_U\_33  
\_atom\_site\_aniso\_U\_23  
\_atom\_site\_aniso\_U\_13  
\_atom\_site\_aniso\_U\_12  
Pb1 0.0202(2) 0.0151(2) 0.0158(3) -0.00025(14) 0.0119(2) -0.00216(12)  
Se1 0.0185(5) 0.0127(4) 0.0128(6) 0.0010(4) 0.0109(5) 0.0001(3)  
Pd1 0.0163(5) 0.0130(4) 0.0137(6) -0.0020(4) 0.0105(5) -0.0034(4)  
Cl1 0.0282(13) 0.0203(11) 0.0167(15) -0.0019(10) 0.0151(12) 0.0002(9)  
O1 0.027(4) 0.019(3) 0.022(4) -0.007(3) 0.018(3) -0.005(3)  
O2 0.047(4) 0.030(4) 0.024(5) -0.017(4) 0.023(4) -0.023(4)  
O3 0.034(4) 0.022(3) 0.021(4) 0.003(3) 0.016(4) 0.009(3)

\_geom\_special\_details

;

All esds (except the esd in the dihedral angle between two l.s. planes) are estimated using the full covariance matrix. The cell esds are taken into account individually in the estimation of esds in distances, angles and torsion angles; correlations between esds in cell parameters are only used when they are defined by crystal symmetry. An approximate (isotropic) treatment of cell esds is used for estimating esds involving l.s. planes.

;

```
loop_  
_geom_bond_atom_site_label_1  
_geom_bond_atom_site_label_2  
_geom_bond_distance  
_geom_bond_site_symmetry_2  
_geom_bond_publ_flag  
Pb1 O1 2.378(7) . ?  
Pb1 O3 2.520(7) 1_545 ?  
Pb1 O2 2.567(7) 2_545 ?  
Pb1 O1 2.655(7) 2_545 ?  
Pb1 O3 2.681(8) 3_566 ?  
Pb1 Cl1 3.190(3) . ?  
Pb1 Cl1 3.309(3) 1_565 ?  
Pb1 Cl1 3.344(4) 2_455 ?  
Pb1 Se1 3.484(3) 2_545 ?  
Pb1 Se1 3.653(2) . ?  
Pb1 Pb1 4.284(3) 3_556 ?  
Se1 O3 1.686(7) . ?  
Se1 O1 1.715(7) . ?  
Se1 O2 1.721(7) . ?  
Se1 Pb1 3.484(3) 2 ?  
Pd1 O2 1.995(7) 3_676 ?  
Pd1 O2 1.995(7) . ?  
Pd1 Cl1 2.307(3) 2_565 ?  
Pd1 Cl1 2.307(3) 4_666 ?  
Cl1 Pd1 2.307(3) 2_535 ?  
Cl1 Pb1 3.309(3) 1_545 ?  
Cl1 Pb1 3.344(4) 2_445 ?  
O1 Pb1 2.655(7) 2 ?  
O2 Pb1 2.567(7) 2 ?  
O3 Pb1 2.520(7) 1_565 ?  
O3 Pb1 2.681(8) 3_566 ?
```

```
loop_  
_geom_angle_atom_site_label_1
```



\_geom\_angle\_atom\_site\_label\_2  
\_geom\_angle\_atom\_site\_label\_3  
\_geom\_angle  
\_geom\_angle\_site\_symmetry\_1  
\_geom\_angle\_site\_symmetry\_3  
\_geom\_angle\_publ\_flag  
O1 Pb1 O3 97.6(2) . 1\_545 ?  
O1 Pb1 O2 81.7(3) . 2\_545 ?  
O3 Pb1 O2 148.5(2) 1\_545 2\_545 ?  
O1 Pb1 O1 81.39(16) . 2\_545 ?  
O3 Pb1 O1 91.8(2) 1\_545 2\_545 ?  
O2 Pb1 O1 56.8(2) 2\_545 2\_545 ?  
O1 Pb1 O3 79.6(2) . 3\_566 ?  
O3 Pb1 O3 69.1(3) 1\_545 3\_566 ?  
O2 Pb1 O3 140.3(2) 2\_545 3\_566 ?  
O1 Pb1 O3 150.8(2) 2\_545 3\_566 ?  
O1 Pb1 Cl1 161.47(17) . . ?  
O3 Pb1 Cl1 85.11(18) 1\_545 . ?  
O2 Pb1 Cl1 86.48(19) 2\_545 . ?  
O1 Pb1 Cl1 80.21(16) 2\_545 . ?  
O3 Pb1 Cl1 118.21(17) 3\_566 . ?  
O1 Pb1 Cl1 77.66(18) . 1\_565 ?  
O3 Pb1 Cl1 152.92(17) 1\_545 1\_565 ?  
O2 Pb1 Cl1 58.01(17) 2\_545 1\_565 ?  
O1 Pb1 Cl1 113.42(15) 2\_545 1\_565 ?  
O3 Pb1 Cl1 83.83(16) 3\_566 1\_565 ?  
Cl1 Pb1 Cl1 107.90(10) . 1\_565 ?  
O1 Pb1 Cl1 131.79(17) . 2\_455 ?  
O3 Pb1 Cl1 105.38(17) 1\_545 2\_455 ?  
O2 Pb1 Cl1 97.96(17) 2\_545 2\_455 ?  
O1 Pb1 Cl1 137.97(16) 2\_545 2\_455 ?  
O3 Pb1 Cl1 70.42(16) 3\_566 2\_455 ?  
Cl1 Pb1 Cl1 63.89(7) . 2\_455 ?  
Cl1 Pb1 Cl1 62.67(6) 1\_565 2\_455 ?  
O1 Pb1 Se1 80.24(17) . 2\_545 ?  
O3 Pb1 Se1 120.36(17) 1\_545 2\_545 ?  
O2 Pb1 Se1 28.19(15) 2\_545 2\_545 ?  
O1 Pb1 Se1 28.58(15) 2\_545 2\_545 ?  
O3 Pb1 Se1 158.75(16) 3\_566 2\_545 ?  
Cl1 Pb1 Se1 82.58(6) . 2\_545 ?  
Cl1 Pb1 Se1 85.47(6) 1\_565 2\_545 ?  
Cl1 Pb1 Se1 120.00(7) 2\_455 2\_545 ?  
O1 Pb1 Se1 22.45(17) . . ?  
O3 Pb1 Se1 84.74(18) 1\_545 . ?

O2 Pb1 Se1 102.24(19) 2\_545 . ?  
O1 Pb1 Se1 100.11(16) 2\_545 . ?  
O3 Pb1 Se1 57.63(16) 3\_566 . ?  
Cl1 Pb1 Se1 169.86(5) . . ?  
Cl1 Pb1 Se1 81.38(8) 1\_565 . ?  
Cl1 Pb1 Se1 119.13(6) 2\_455 . ?  
Se1 Pb1 Se1 102.61(5) 2\_545 . ?  
O1 Pb1 Pb1 87.97(17) . 3\_556 ?  
O3 Pb1 Pb1 35.78(17) 1\_545 3\_556 ?  
O2 Pb1 Pb1 169.30(18) 2\_545 3\_556 ?  
O1 Pb1 Pb1 124.38(15) 2\_545 3\_556 ?  
O3 Pb1 Pb1 33.33(15) 3\_566 3\_556 ?  
Cl1 Pb1 Pb1 104.22(6) . 3\_556 ?  
Cl1 Pb1 Pb1 117.15(5) 1\_565 3\_556 ?  
Cl1 Pb1 Pb1 86.92(7) 2\_455 3\_556 ?  
Se1 Pb1 Pb1 151.70(4) 2\_545 3\_556 ?  
Se1 Pb1 Pb1 67.11(4) . 3\_556 ?  
O3 Se1 O1 104.6(3) . . ?  
O3 Se1 O2 102.3(4) . . ?  
O1 Se1 O2 92.6(3) . . ?  
O3 Se1 Pb1 109.4(3) . 2 ?  
O1 Se1 Pb1 47.8(2) . 2 ?  
O2 Se1 Pb1 44.8(2) . 2 ?  
O3 Se1 Pb1 97.3(3) . . ?  
O1 Se1 Pb1 32.0(2) . . ?  
O2 Se1 Pb1 124.5(2) . . ?  
Pb1 Se1 Pb1 79.71(5) 2 . ?  
O2 Pd1 O2 180.000(1) 3\_676 . ?  
O2 Pd1 Cl1 94.8(2) 3\_676 2\_565 ?  
O2 Pd1 Cl1 85.2(2) . 2\_565 ?  
O2 Pd1 Cl1 85.2(2) 3\_676 4\_666 ?  
O2 Pd1 Cl1 94.8(2) . 4\_666 ?  
Cl1 Pd1 Cl1 180.000(1) 2\_565 4\_666 ?  
Pd1 Cl1 Pb1 106.37(9) 2\_535 . ?  
Pd1 Cl1 Pb1 91.01(8) 2\_535 1\_545 ?  
Pb1 Cl1 Pb1 107.90(10) . 1\_545 ?  
Pd1 Cl1 Pb1 114.55(10) 2\_535 2\_445 ?  
Pb1 Cl1 Pb1 118.37(8) . 2\_445 ?  
Pb1 Cl1 Pb1 115.05(8) 1\_545 2\_445 ?  
Se1 O1 Pb1 125.6(3) . . ?  
Se1 O1 Pb1 103.6(3) . 2 ?  
Pb1 O1 Pb1 130.7(3) . 2 ?  
Se1 O2 Pd1 126.0(4) . . ?  
Se1 O2 Pb1 107.0(3) . 2 ?

Pd1 O2 Pb1 125.7(3) . 2 ?  
Se1 O3 Pb1 127.8(4) . 1\_565 ?  
Se1 O3 Pb1 118.6(3) . 3\_566 ?  
Pb1 O3 Pb1 110.9(3) 1\_565 3\_566 ?

\_diffn\_measured\_fraction\_theta\_max 0.960  
\_diffn\_reflns\_theta\_full 27.41  
\_diffn\_measured\_fraction\_theta\_full 0.960  
\_refine\_diff\_density\_max 2.407  
\_refine\_diff\_density\_min -3.475  
\_refine\_diff\_density\_rms 0.431

#===end

data\_Bi2Pd(SeO3)4

\_audit\_creation\_method SHELXL-97  
\_chemical\_name\_systematic  
;  
?  
;  
\_chemical\_name\_common ?  
\_chemical\_melting\_point ?  
\_chemical\_formula\_moiety 'Bi2 O12 Pd Se4'  
\_chemical\_formula\_sum 'Bi2 O12 Pd Se4'  
  
\_chemical\_formula\_weight 1032.20

loop\_  
\_atom\_type\_symbol  
\_atom\_type\_description  
\_atom\_type\_scatter\_dispersion\_real  
\_atom\_type\_scatter\_dispersion\_imag  
\_atom\_type\_scatter\_source  
O O 0.0106 0.0060 'International Tables Vol C Tables 4.2.6.8 and 6.1.1.4'  
Se Se -0.0929 2.2259 'International Tables Vol C Tables 4.2.6.8 and 6.1.1.4'  
Pd Pd -0.9988 1.0072 'International Tables Vol C Tables 4.2.6.8 and 6.1.1.4'  
Bi Bi -4.1077 10.2566 'International Tables Vol C Tables 4.2.6.8 and 6.1.1.4'

\_symmetry\_cell\_setting monoclinic  
\_symmetry\_space\_group\_name\_H-M P2(1)/c

loop\_  
\_symmetry\_equiv\_pos\_as\_xyz

'x, y, z'  
'-x, y+1/2, -z+1/2'  
'-x, -y, -z'  
'x, -y-1/2, z-1/2'

\_cell\_length\_a 10.721(5)  
\_cell\_length\_b 7.165(3)  
\_cell\_length\_c 8.112(4)  
\_cell\_angle\_alpha 90.00  
\_cell\_angle\_beta 109.732(5)  
\_cell\_angle\_gamma 90.00  
\_cell\_volume 586.5(5)  
\_cell\_formula\_units\_Z 2  
\_cell\_measurement\_temperature 293(2)  
\_cell\_measurement\_reflns\_used 1806  
\_cell\_measurement\_theta\_min 2.0181  
\_cell\_measurement\_theta\_max 27.4739

\_exptl\_crystal\_description needle  
\_exptl\_crystal\_colour brown  
\_exptl\_crystal\_size\_max 0.0400  
\_exptl\_crystal\_size\_mid 0.0100  
\_exptl\_crystal\_size\_min 0.0100  
\_exptl\_crystal\_density\_meas ?  
\_exptl\_crystal\_density\_diffn 5.845  
\_exptl\_crystal\_density\_method 'not measured'  
\_exptl\_crystal\_F\_000 888  
\_exptl\_absorpt\_coefficient\_mu 43.918  
\_exptl\_absorpt\_correction\_type Multi-scan  
\_exptl\_absorpt\_correction\_T\_max 1.0000  
\_exptl\_absorpt\_correction\_T\_min 0.6790  
\_exptl\_absorpt\_process\_details

;

Higashi, T. (1995). Program for Absorption Correction.  
Rigaku Corporation, Tokyo, Japan.

;

\_exptl\_special\_details  
;  
?  
;

\_diffn\_ambient\_temperature 293(2)  
\_diffn\_radiation\_wavelength 0.71073

```
_diffraction_radiation_type      MoK $\alpha$ 
_diffraction_radiation_source    'fine-focus sealed tube'
_diffraction_radiation_monochromator  graphite
_diffraction_measurement_device_type 'Saturn724+ (2x2 bin mode)'
_diffraction_measurement_method     CCD_Profile_fitting
_diffraction_detector_area_resol_mean ?
_diffraction_standards_number      ?
_diffraction_standards_interval_count ?
_diffraction_standards_interval_time ?
_diffraction_standards_decay_%     <1.0
_diffraction_reflections_number     4400
_diffraction_reflections_av_R_equivalents 0.0315
_diffraction_reflections_av_sigmaI/netI 0.0317
_diffraction_reflections_limit_h_min -13
_diffraction_reflections_limit_h_max  11
_diffraction_reflections_limit_k_min  -9
_diffraction_reflections_limit_k_max   9
_diffraction_reflections_limit_l_min  -10
_diffraction_reflections_limit_l_max   10
_diffraction_reflections_theta_min    3.49
_diffraction_reflections_theta_max    27.46
_reflections_number_total            1332
_reflections_number_gt               1202
_reflections_threshold_expression     >2sigma(I)

_computing_data_collection          'CrystalClear (Rigaku Inc., 2007)'
_computing_cell_refinement          'CrystalClear (Rigaku Inc., 2007)'
_computing_data_reduction           'CrystalClear (Rigaku Inc., 2007)'
_computing_structure_solution       'SHELXS-97 (Sheldrick, 1990)'
_computing_structure_refinement     'SHELXL-97 (Sheldrick, 1997)'
_computing_molecular_graphics       ?
_computing_publication_material     ?
```

\_refinement\_special\_details

;

Refinement of  $F^2$  against ALL reflections. The weighted R-factor  $wR$  and goodness of fit  $S$  are based on  $F^2$ , conventional R-factors  $R$  are based on  $F$ , with  $F$  set to zero for negative  $F^2$ . The threshold expression of  $F^2 > 2\sigma(F^2)$  is used only for calculating R-factors(gt) etc. and is not relevant to the choice of reflections for refinement. R-factors based on  $F^2$  are statistically about twice as large as those based on  $F$ , and R-factors based on ALL data will be even larger.

;

```
_refine_ls_structure_factor_coef Fsqd
_refine_ls_matrix_type full
_refine_ls_weighting_scheme calc
_refine_ls_weighting_details
'calc w=1/[\s^2^(Fo^2^)+(0.0147P)^2^+0.0000P] where P=(Fo^2^+2Fc^2^)/3'
_atom_sites_solution_primary direct
_atom_sites_solution_secondary difmap
_atom_sites_solution_hydrogens constr
_refine_ls_hydrogen_treatment constr
_refine_ls_extinction_method SHELXL
_refine_ls_extinction_coef 0.00078(9)
_refine_ls_extinction_expression Fc^*^=kFc[1+0.001xFc^2^/l^3^/sin(2\q)]^-1/4^
_refine_ls_number_reflns 1332
_refine_ls_number_parameters 89
_refine_ls_number_restraints 0
_refine_ls_R_factor_all 0.0216
_refine_ls_R_factor_gt 0.0181
_refine_ls_wR_factor_ref 0.0369
_refine_ls_wR_factor_gt 0.0360
_refine_ls_goodness_of_fit_ref 0.979
_refine_ls_restrained_S_all 0.979
_refine_ls_shift/su_max 0.000
_refine_ls_shift/su_mean 0.000
```

loop\_

```
_atom_site_label
_atom_site_type_symbol
_atom_site_fract_x
_atom_site_fract_y
_atom_site_fract_z
_atom_site_U_iso_or_equiv
_atom_site_adp_type
_atom_site_occupancy
_atom_site_symmetry_multiplicity
_atom_site_calc_flag
_atom_site_refinement_flags
_atom_site_disorder_assembly
_atom_site_disorder_group
Bi1 Bi 0.09360(2) 0.12209(3) 0.74520(2) 0.00526(7) Uani 1 1 d . . .
Pd1 Pd -0.5000 0.0000 1.0000 0.00584(13) Uani 1 2 d S . .
Se1 Se -0.18655(5) 0.17301(7) 0.86216(6) 0.00477(12) Uani 1 1 d . . .
Se2 Se -0.36518(5) -0.16733(7) 0.38706(6) 0.00600(12) Uani 1 1 d . . .
O1 O -0.3429(4) -0.0971(5) 0.1953(4) 0.0084(8) Uani 1 1 d . . .
O2 O -0.1766(4) 0.1170(5) 1.0692(4) 0.0075(8) Uani 1 1 d . . .
```

O3 O -0.0729(4) 0.3548(4) 0.9175(4) 0.0068(8) Uani 1 1 d . . .  
O4 O -0.4375(4) -0.3771(5) 0.3190(5) 0.0116(9) Uani 1 1 d . . .  
O5 O -0.0940(4) 0.0119(5) 0.8052(5) 0.0080(8) Uani 1 1 d . . .  
O6 O -0.2029(4) -0.2158(5) 0.4817(4) 0.0076(8) Uani 1 1 d . . .

loop\_

\_atom\_site\_aniso\_label

\_atom\_site\_aniso\_U\_11

\_atom\_site\_aniso\_U\_22

\_atom\_site\_aniso\_U\_33

\_atom\_site\_aniso\_U\_23

\_atom\_site\_aniso\_U\_13

\_atom\_site\_aniso\_U\_12

Bi1 0.00598(12) 0.00391(11) 0.00512(10) -0.00029(7) 0.00087(8) -0.00021(7)

Pd1 0.0047(3) 0.0074(3) 0.0042(3) 0.0012(2) 0.0000(2) 0.0026(2)

Se1 0.0047(3) 0.0043(2) 0.0039(2) 0.00022(18) -0.0004(2) -0.00063(19)

Se2 0.0051(3) 0.0071(3) 0.0050(2) 0.00119(19) 0.0008(2) 0.0010(2)

O1 0.004(2) 0.015(2) 0.0067(18) 0.0055(15) 0.0022(15) 0.0020(15)

O2 0.009(2) 0.0059(18) 0.0068(17) 0.0017(14) 0.0024(16) 0.0033(15)

O3 0.003(2) 0.0050(17) 0.0097(18) 0.0017(14) -0.0007(15) -0.0013(14)

O4 0.012(2) 0.015(2) 0.0078(18) -0.0013(15) 0.0039(17) -0.0096(16)

O5 0.011(2) 0.0066(18) 0.0110(18) -0.0025(15) 0.0091(16) -0.0003(15)

O6 0.004(2) 0.0120(19) 0.0052(17) 0.0016(15) -0.0009(15) -0.0029(15)

\_geom\_special\_details

;

All esds (except the esd in the dihedral angle between two l.s. planes) are estimated using the full covariance matrix. The cell esds are taken into account individually in the estimation of esds in distances, angles and torsion angles; correlations between esds in cell parameters are only used when they are defined by crystal symmetry. An approximate (isotropic) treatment of cell esds is used for estimating esds involving l.s. planes.

;

loop\_

\_geom\_bond\_atom\_site\_label\_1

\_geom\_bond\_atom\_site\_label\_2

\_geom\_bond\_distance

\_geom\_bond\_site\_symmetry\_2

\_geom\_bond\_publ\_flag

Bi1 O2 2.256(3) 3\_557 ?

Bi1 O3 2.294(3) 2\_546 ?

Bi1 O5 2.359(4) . ?

Bi1 O6 2.424(3) 2\_556 ?

Bi1 O1 2.557(4) 3\_556 ?  
Bi1 O6 2.582(4) 3\_556 ?  
Bi1 O3 2.660(4) 4\_565 ?  
Pd1 O1 2.007(4) 1\_556 ?  
Pd1 O1 2.007(4) 3\_456 ?  
Pd1 O4 2.011(4) 2\_456 ?  
Pd1 O4 2.011(4) 4\_556 ?  
Se1 O5 1.685(4) . ?  
Se1 O2 1.694(3) . ?  
Se1 O3 1.736(3) . ?  
Se2 O6 1.684(4) . ?  
Se2 O4 1.695(4) . ?  
Se2 O1 1.727(3) . ?  
O1 Pd1 2.007(4) 1\_554 ?  
O1 Bi1 2.557(4) 3\_556 ?  
O2 Bi1 2.256(3) 3\_557 ?  
O3 Bi1 2.294(3) 2\_556 ?  
O3 Bi1 2.660(4) 4\_566 ?  
O4 Pd1 2.011(4) 2\_446 ?  
O6 Bi1 2.424(3) 2\_546 ?  
O6 Bi1 2.582(4) 3\_556 ?

loop\_

\_geom\_angle\_atom\_site\_label\_1  
\_geom\_angle\_atom\_site\_label\_2  
\_geom\_angle\_atom\_site\_label\_3  
\_geom\_angle  
\_geom\_angle\_site\_symmetry\_1  
\_geom\_angle\_site\_symmetry\_3  
\_geom\_angle\_publ\_flag  
O2 Bi1 O3 71.93(12) 3\_557 2\_546 ?  
O2 Bi1 O5 77.28(13) 3\_557 . ?  
O3 Bi1 O5 85.17(13) 2\_546 . ?  
O2 Bi1 O6 78.10(12) 3\_557 2\_556 ?  
O3 Bi1 O6 148.10(12) 2\_546 2\_556 ?  
O5 Bi1 O6 98.87(13) . 2\_556 ?  
O2 Bi1 O1 70.68(12) 3\_557 3\_556 ?  
O3 Bi1 O1 86.68(12) 2\_546 3\_556 ?  
O5 Bi1 O1 147.91(12) . 3\_556 ?  
O6 Bi1 O1 73.10(12) 2\_556 3\_556 ?  
O2 Bi1 O6 120.11(12) 3\_557 3\_556 ?  
O3 Bi1 O6 77.64(12) 2\_546 3\_556 ?  
O5 Bi1 O6 149.05(12) . 3\_556 ?  
O6 Bi1 O6 109.35(12) 2\_556 3\_556 ?



O1 Bi1 O6 57.04(11) 3\_556 3\_556 ?  
O2 Bi1 O3 134.01(12) 3\_557 4\_565 ?  
O3 Bi1 O3 64.85(13) 2\_546 4\_565 ?  
O5 Bi1 O3 84.02(12) . 4\_565 ?  
O6 Bi1 O3 146.88(11) 2\_556 4\_565 ?  
O1 Bi1 O3 119.94(11) 3\_556 4\_565 ?  
O6 Bi1 O3 65.44(12) 3\_556 4\_565 ?  
O1 Pd1 O1 180.000(1) 1\_556 3\_456 ?  
O1 Pd1 O4 88.47(15) 1\_556 2\_456 ?  
O1 Pd1 O4 91.53(15) 3\_456 2\_456 ?  
O1 Pd1 O4 91.53(15) 1\_556 4\_556 ?  
O1 Pd1 O4 88.47(15) 3\_456 4\_556 ?  
O4 Pd1 O4 180.000(1) 2\_456 4\_556 ?  
O5 Se1 O2 105.28(17) . . ?  
O5 Se1 O3 99.09(18) . . ?  
O2 Se1 O3 96.74(17) . . ?  
O6 Se2 O4 104.72(18) . . ?  
O6 Se2 O1 91.99(17) . . ?  
O4 Se2 O1 98.75(18) . . ?  
Se2 O1 Pd1 118.5(2) . 1\_554 ?  
Se2 O1 Bi1 105.27(16) . 3\_556 ?  
Pd1 O1 Bi1 135.93(16) 1\_554 3\_556 ?  
Se1 O2 Bi1 136.06(19) . 3\_557 ?  
Se1 O3 Bi1 123.66(18) . 2\_556 ?  
Se1 O3 Bi1 118.76(16) . 4\_566 ?  
Bi1 O3 Bi1 115.15(13) 2\_556 4\_566 ?  
Se2 O4 Pd1 112.26(19) . 2\_446 ?  
Se1 O5 Bi1 116.69(18) . . ?  
Se2 O6 Bi1 128.42(19) . 2\_546 ?  
Se2 O6 Bi1 105.61(16) . 3\_556 ?  
Bi1 O6 Bi1 125.49(16) 2\_546 3\_556 ?

\_diffn\_measured\_fraction\_theta\_max 0.996  
\_diffn\_reflns\_theta\_full 27.46  
\_diffn\_measured\_fraction\_theta\_full 0.996  
\_refine\_diff\_density\_max 1.013  
\_refine\_diff\_density\_min -1.433  
\_refine\_diff\_density\_rms 0.258

# Attachment '- zsy-dalton-revised.CIF'

data\_BaPd(SeO3)2

\_audit\_creation\_method SHELXL-97

```
_chemical_name_systematic
;
?
;
_chemical_name_common          ?
_chemical_melting_point        ?
_chemical_formula_moiety       'Ba O6 Pd Se2'
_chemical_formula_sum           'Ba O6 Pd Se2'

_chemical_formula_weight       497.67
```

```
loop_
  _atom_type_symbol
  _atom_type_description
  _atom_type_scatter_dispersion_real
  _atom_type_scatter_dispersion_imag
  _atom_type_scatter_source
Ba Ba -0.3244 2.2819 'International Tables Vol C Tables 4.2.6.8 and 6.1.1.4'
O O 0.0106 0.0060 'International Tables Vol C Tables 4.2.6.8 and 6.1.1.4'
Pd Pd -0.9988 1.0072 'International Tables Vol C Tables 4.2.6.8 and 6.1.1.4'
Se Se -0.0929 2.2259 'International Tables Vol C Tables 4.2.6.8 and 6.1.1.4'
```

```
_symmetry_cell_setting        monoclinic
_symmetry_space_group_name_H-M C2/c
```

```
loop_
  _symmetry_equiv_pos_as_xyz
'x, y, z'
'-x, y, -z+1/2'
'x+1/2, y+1/2, z'
'-x+1/2, y+1/2, -z+1/2'
'-x, -y, -z'
'x, -y, z-1/2'
'-x+1/2, -y+1/2, -z'
'x+1/2, -y+1/2, z-1/2'
```

```
_cell_length_a                8.083(7)
_cell_length_b                5.221(4)
_cell_length_c                16.004(14)
_cell_angle_alpha             90.00
_cell_angle_beta              91.227(19)
_cell_angle_gamma             90.00
_cell_volume                   675.2(10)
_cell_formula_units_Z         4
```

\_cell\_measurement\_temperature 293(2)  
\_cell\_measurement\_reflms\_used 984  
\_cell\_measurement\_theta\_min 2.5460  
\_cell\_measurement\_theta\_max 27.5126

\_exptl\_crystal\_description prism  
\_exptl\_crystal\_colour red  
\_exptl\_crystal\_size\_max 0.0500  
\_exptl\_crystal\_size\_mid 0.0300  
\_exptl\_crystal\_size\_min 0.0100  
\_exptl\_crystal\_density\_meas ?  
\_exptl\_crystal\_density\_diffn 4.895  
\_exptl\_crystal\_density\_method 'not measured'  
\_exptl\_crystal\_F\_000 872  
\_exptl\_absorpt\_coefficient\_mu 19.208  
\_exptl\_absorpt\_correction\_type Multi-scan  
\_exptl\_absorpt\_correction\_T\_max 1.0000  
\_exptl\_absorpt\_correction\_T\_min 0.7748  
\_exptl\_absorpt\_process\_details

;

Higashi, T. (1995). Program for Absorption Correction.  
Rigaku Corporation, Tokyo, Japan.

;

\_exptl\_special\_details

;

?

;

\_diffn\_ambient\_temperature 293(2)  
\_diffn\_radiation\_wavelength 0.71073  
\_diffn\_radiation\_type MoK $\alpha$   
\_diffn\_radiation\_source 'fine-focus sealed tube'  
\_diffn\_radiation\_monochromator graphite  
\_diffn\_measurement\_device\_type 'Saturn724+ (2x2 bin mode)'  
\_diffn\_measurement\_method CCD\_Profile\_fitting  
\_diffn\_detector\_area\_resol\_mean ?  
\_diffn\_standards\_number ?  
\_diffn\_standards\_interval\_count ?  
\_diffn\_standards\_interval\_time ?  
\_diffn\_standards\_decay\_% <1.0  
\_diffn\_reflms\_number 2396  
\_diffn\_reflms\_av\_R\_equivalents 0.0310  
\_diffn\_reflms\_av\_sigmaI/netI 0.0378

```
_diffn_reflms_limit_h_min      -10
_diffn_reflms_limit_h_max      10
_diffn_reflms_limit_k_min      -6
_diffn_reflms_limit_k_max      6
_diffn_reflms_limit_l_min      -18
_diffn_reflms_limit_l_max      20
_diffn_reflms_theta_min        2.55
_diffn_reflms_theta_max        27.49
_reflms_number_total           760
_reflms_number_gt               663
_reflms_threshold_expression    >2sigma(I)

_computing_data_collection      'CrystalClear (Rigaku Inc., 2007)'
_computing_cell_refinement      'CrystalClear (Rigaku Inc., 2007)'
_computing_data_reduction       'CrystalClear (Rigaku Inc., 2007)'
_computing_structure_solution   'SHELXS-97 (Sheldrick, 1990)'
_computing_structure_refinement 'SHELXL-97 (Sheldrick, 1997)'
_computing_molecular_graphics   ?
_computing_publication_material ?
```

\_refine\_special\_details

;

Refinement of  $F^2$  against ALL reflections. The weighted R-factor wR and goodness of fit S are based on  $F^2$ , conventional R-factors R are based on F, with F set to zero for negative  $F^2$ . The threshold expression of  $F^2 > 2\sigma(F^2)$  is used only for calculating R-factors(gt) etc. and is not relevant to the choice of reflections for refinement. R-factors based on  $F^2$  are statistically about twice as large as those based on F, and R-factors based on ALL data will be even larger.

;

```
_refine_ls_structure_factor_coef Fsqd
_refine_ls_matrix_type          full
_refine_ls_weighting_scheme     calc
_refine_ls_weighting_details
'calc w=1/[s^2(Fo^2)+(0.0250P)^2+0.0000P] where P=(Fo^2+2Fc^2)/3'
_atom_sites_solution_primary    direct
_atom_sites_solution_secondary  difmap
_atom_sites_solution_hydrogens  constr
_refine_ls_hydrogen_treatment  constr
_refine_ls_extinction_method    none
_refine_ls_extinction_coef      ?
_refine_ls_number_reflms        760
_refine_ls_number_parameters    48
```



O3 0.023(2) 0.0052(17) 0.010(2) 0.0006(14) 0.0035(17) -0.0038(15)

\_geom\_special\_details

;

All esds (except the esd in the dihedral angle between two l.s. planes) are estimated using the full covariance matrix. The cell esds are taken into account individually in the estimation of esds in distances, angles and torsion angles; correlations between esds in cell parameters are only used when they are defined by crystal symmetry. An approximate (isotropic) treatment of cell esds is used for estimating esds involving l.s. planes.

;

loop\_

\_geom\_bond\_atom\_site\_label\_1

\_geom\_bond\_atom\_site\_label\_2

\_geom\_bond\_distance

\_geom\_bond\_site\_symmetry\_2

\_geom\_bond\_publ\_flag

Pd1 O3 2.002(4) 5 ?

Pd1 O3 2.002(4) 1\_565 ?

Pd1 O2 2.030(3) 5\_565 ?

Pd1 O2 2.030(3) . ?

Pd1 Se1 3.1493(18) 5\_565 ?

Pd1 Se1 3.1493(18) . ?

Pd1 Se1 3.2090(19) 5 ?

Pd1 Se1 3.2090(19) 1\_565 ?

Se1 O1 1.668(4) . ?

Se1 O3 1.718(4) . ?

Se1 O2 1.725(4) . ?

Se1 Pd1 3.2090(19) 1\_545 ?

O3 Pd1 2.002(4) 1\_545 ?

loop\_

\_geom\_angle\_atom\_site\_label\_1

\_geom\_angle\_atom\_site\_label\_2

\_geom\_angle\_atom\_site\_label\_3

\_geom\_angle

\_geom\_angle\_site\_symmetry\_1

\_geom\_angle\_site\_symmetry\_3

\_geom\_angle\_publ\_flag

O3 Pd1 O3 180.00(12) 5 1\_565 ?

O3 Pd1 O2 85.26(15) 5 5\_565 ?

O3 Pd1 O2 94.74(15) 1\_565 5\_565 ?

O3 Pd1 O2 94.74(15) 5 . ?

O3 Pd1 O2 85.26(15) 1\_565 . ?  
O2 Pd1 O2 180.00(19) 5\_565 . ?  
O3 Pd1 Se1 93.55(11) 5 5\_565 ?  
O3 Pd1 Se1 86.45(11) 1\_565 5\_565 ?  
O2 Pd1 Se1 30.09(11) 5\_565 5\_565 ?  
O2 Pd1 Se1 149.91(11) . 5\_565 ?  
O3 Pd1 Se1 86.45(11) 5 . ?  
O3 Pd1 Se1 93.55(11) 1\_565 . ?  
O2 Pd1 Se1 149.91(11) 5\_565 . ?  
O2 Pd1 Se1 30.09(11) . . ?  
Se1 Pd1 Se1 180.000(17) 5\_565 . ?  
O3 Pd1 Se1 27.91(10) 5 5 ?  
O3 Pd1 Se1 152.09(10) 1\_565 5 ?  
O2 Pd1 Se1 111.05(11) 5\_565 5 ?  
O2 Pd1 Se1 68.95(11) . 5 ?  
Se1 Pd1 Se1 110.39(6) 5\_565 5 ?  
Se1 Pd1 Se1 69.61(6) . 5 ?  
O3 Pd1 Se1 152.09(10) 5 1\_565 ?  
O3 Pd1 Se1 27.91(10) 1\_565 1\_565 ?  
O2 Pd1 Se1 68.95(11) 5\_565 1\_565 ?  
O2 Pd1 Se1 111.05(11) . 1\_565 ?  
Se1 Pd1 Se1 69.61(6) 5\_565 1\_565 ?  
Se1 Pd1 Se1 110.39(6) . 1\_565 ?  
Se1 Pd1 Se1 180.000(19) 5 1\_565 ?  
O1 Se1 O3 98.62(17) . . ?  
O1 Se1 O2 100.69(17) . . ?  
O3 Se1 O2 98.85(18) . . ?  
O1 Se1 Pd1 115.05(13) . . ?  
O3 Se1 Pd1 125.36(13) . . ?  
O2 Se1 Pd1 36.14(11) . . ?  
O1 Se1 Pd1 128.88(12) . 1\_545 ?  
O3 Se1 Pd1 33.05(12) . 1\_545 ?  
O2 Se1 Pd1 102.33(13) . 1\_545 ?  
Pd1 Se1 Pd1 110.39(6) . 1\_545 ?  
Se1 O2 Pd1 113.77(19) . . ?  
Se1 O3 Pd1 119.04(19) . 1\_545 ?

\_diffn\_measured\_fraction\_theta\_max 0.978  
\_diffn\_reflns\_theta\_full 27.49  
\_diffn\_measured\_fraction\_theta\_full 0.978  
\_refine\_diff\_density\_max 1.847  
\_refine\_diff\_density\_min -1.374  
\_refine\_diff\_density\_rms 0.268
